# Supplementary figures and images for: Design and Fabrication of a Fully-Integrated, Miniaturised Fluidic System for the Analysis of Enzyme Kinetics
Source: Preprints.org preprint supplement (doi:10.20944/preprints202302.0288.v1), 2023-02-17

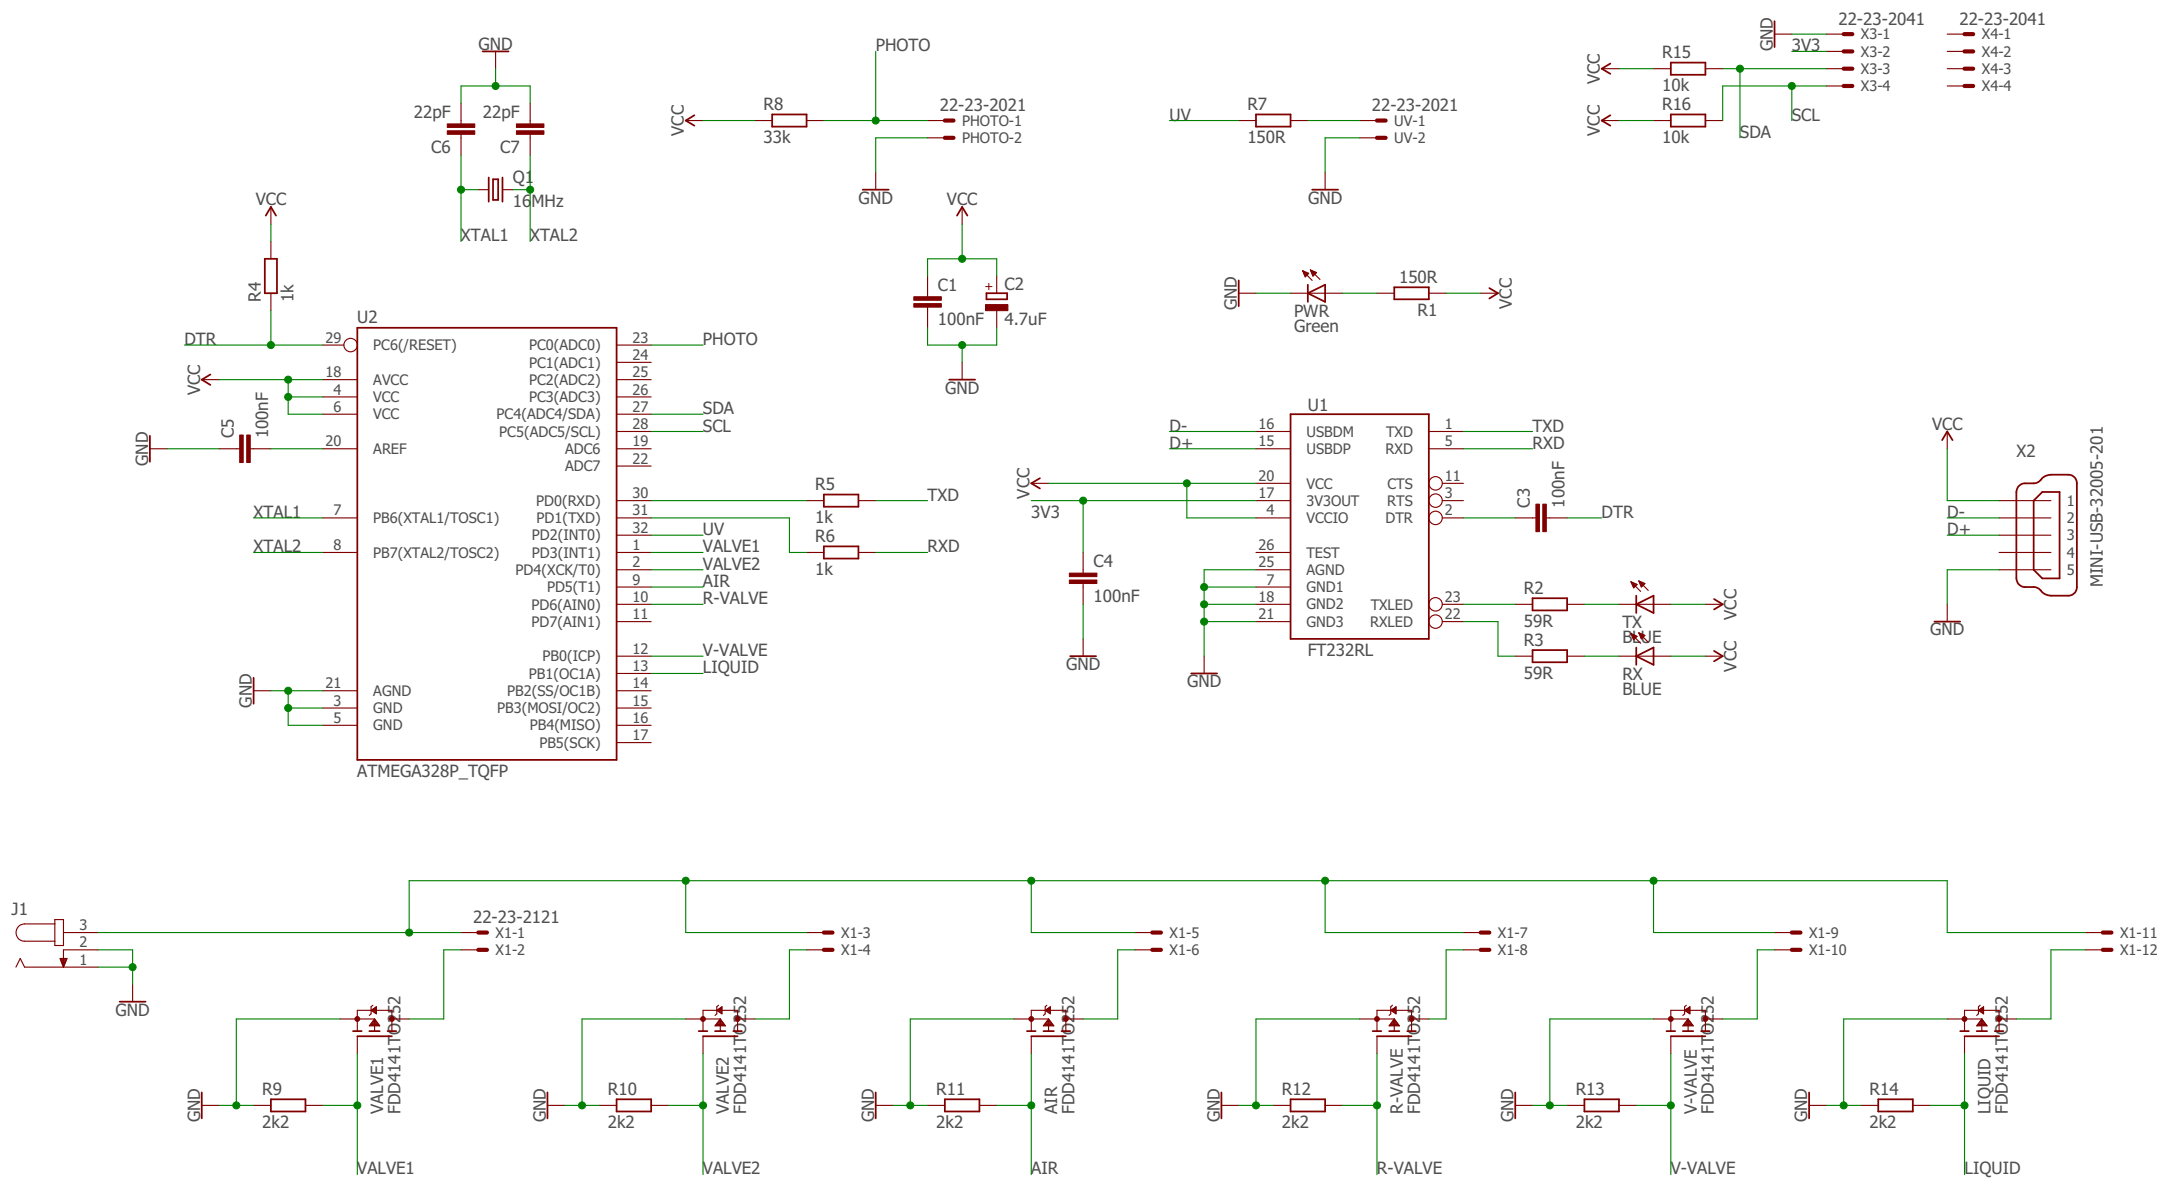

Supplement: Supplementary file 1 [file supplementary]
